# Supplementary material
Source: ML conference proceedings conference paper supplement (https://openaccess.thecvf.com/content/CVPR2021/html/Lindell_AutoInt_Automatic_Integration_CVPR_2021_paper.html)
Supplement: Supplementary file 1 [file Lindell_AutoInt_Automatic_Integration_CVPR_2021_supplemental.zip]

# Supplemental Material

## AutoInt: Automatic Integration for Fast Neural Volumetric Rendering

David B. Lindell\*    Julien N. P. Martel\*    Gordon Wetzstein

Stanford University

{lindell, jnmartel, gordon.wetzstein}@stanford.edu

### 1. Multivariable Integration with AutoInt

We consider an implicit neural representation realized by a neural network with parameters  $\theta$ . The network maps low-dimensional input coordinates to a low-dimensional output  $\Phi_\theta : \mathbb{R}^{d_{\text{in}}} \mapsto \mathbb{R}^{d_{\text{out}}}$ , and we assume that the network admits a (sub-)gradient with respect to its input  $\mathbf{x} \in \mathbb{R}^{d_{\text{in}}}$ . We denote by  $\Psi_\theta^i = \partial\Phi_\theta/\partial x_i$  the derivative of the network output with respect to the input coordinate  $x_i$ , and, as described in the main text, we call  $\Psi_\theta^i$  the grad network and  $\Phi_\theta$  the integral network.

By the fundamental theorem of calculus, the grad network and integral network are related as

$$\Phi_\theta(\mathbf{x}) = \int \frac{\partial\Phi_\theta}{\partial x_i}(\mathbf{x}) dx_i = \int \Psi_\theta^i(\mathbf{x}) dx_i. \quad (1)$$

As a corollary we have that definite integrals can be computed by two evaluations of the integral network:

$$\int_{a_i}^{b_i} \Psi_\theta^i(\mathbf{x}) dx_i = \Phi_\theta(\mathbf{x}) \Big|_{x_i=b_i} - \Phi_\theta(\mathbf{x}) \Big|_{x_i=a_i}. \quad (2)$$

Now, we will extend this result to multiple integrations. First, we let  $\Psi_\theta^{i,j} = \partial\Psi_\theta^i/\partial x_j$  be the partial derivative with respect to  $x_j$  such that

$$\Psi_\theta^i = \int \frac{\partial\Psi_\theta^i}{\partial x_j}(\mathbf{x}) dx_j = \int \Psi_\theta^{i,j}(\mathbf{x}) dx_j. \quad (3)$$

Then we can express the double integral as

$$\begin{aligned} \int_{a_i}^{b_i} \int_{a_j}^{b_j} \Psi_\theta^{i,j}(\mathbf{x}) dx_j dx_i \\ &= \int_{a_i}^{b_i} \Psi_\theta^i(\mathbf{x}) \Big|_{x_j=b_j} - \Psi_\theta^i(\mathbf{x}) \Big|_{x_j=a_j} dx_i \\ &= \left( \Phi_\theta(\mathbf{x}) \Big|_{x_j=b_j} - \Phi_\theta(\mathbf{x}) \Big|_{x_j=a_j} \right) \Big|_{x_i=b_i} \\ &\quad - \left( \Phi_\theta(\mathbf{x}) \Big|_{x_j=b_j} - \Phi_\theta(\mathbf{x}) \Big|_{x_j=a_j} \right) \Big|_{x_i=a_i}. \end{aligned} \quad (4)$$

Equation 4 can be further simplified with a slight abuse of notation by letting  $\Phi_\theta(\mathbf{x}) \Big|_{x_i=a_i, x_j=a_j} = \Phi_\theta(a_i, a_j)$ , resulting in

$$\begin{aligned} \int_{a_i}^{b_i} \int_{a_j}^{b_j} \Psi_\theta^{i,j}(\mathbf{x}) dx_j dx_i &= \Phi_\theta(b_i, b_j) - \Phi_\theta(b_i, a_j) \\ &\quad - \Phi_\theta(a_i, b_j) + \Phi_\theta(a_i, a_j). \end{aligned} \quad (5)$$

Stated otherwise, a definite integral over two dimensions can be computed with four evaluations of the integral network at the given bounds.

This result can be extended to  $n$  dimensions with the following formula [6].

$$\begin{aligned} \int_{a_1}^{b_1} \dots \int_{a_n}^{b_n} \Psi_\theta^{1,\dots,n}(\mathbf{x}) dx_n \dots dx_1 \\ &= \sum_{\epsilon_1, \dots, \epsilon_n=0}^1 (-1)^{\epsilon_1 + \dots + \epsilon_n} \Phi_\theta(\epsilon_1 a_1 + \bar{\epsilon}_1 b_1, \dots, \epsilon_n a_n + \bar{\epsilon}_n b_n), \end{aligned} \quad (6)$$

with  $\bar{\epsilon}_i = 1 - \epsilon_i$ . Thus for  $n = 3$ , we would have

$$\begin{aligned} &\Phi_\theta(b_i, b_j, b_k) - \Phi_\theta(b_i, a_j, b_k) - \Phi_\theta(a_i, b_j, b_k) \\ &+ \Phi_\theta(a_i, a_j, b_k) - \Phi_\theta(b_i, b_j, a_k) + \Phi_\theta(b_i, a_j, a_k) \\ &+ \Phi_\theta(a_i, b_j, a_k) - \Phi_\theta(a_i, a_j, a_k). \end{aligned} \quad (7)$$

---

\*Equal contribution.

<http://www.computationalimaging.org/publications/automatic-integration/>

Overall, using AutoInt for multivariable integration follows a similar procedure to evaluating a single integral as described in the main text. First, one constructs the grad network by taking partial derivatives of the integral network with respect to each of the variables of integration. Then, after training, the integral network is reassembled from the parameters  $\theta$  and evaluated at the bounds of the domain as described by Equation 6.

## 2. Deriving the VRE Approximation and Quadrature

### 2.1. Piecewise Constant VRE

Our approximation of the volume rendering equation (VRE), can be viewed as a Riemann integral using  $N$  piecewise constant sections:

$$\tilde{\mathbf{C}}(\mathbf{r}) = \sum_{i=1}^N \bar{\sigma}_i \bar{\mathbf{c}}_i \bar{T}_i \delta_i, \quad (8)$$

where  $\delta_i = t_i - t_{i-1}$  is the length of the section  $i$  along the ray. The density  $\bar{\sigma}_i$  and radiance  $\bar{\mathbf{c}}_i$  of each section are defined as:

$$\bar{\sigma}_i = \delta_i^{-1} \int_{t_{i-1}}^{t_i} \sigma(t) dt, \quad (9)$$

and

$$\bar{\mathbf{c}}_i = \delta_i^{-1} \int_{t_{i-1}}^{t_i} \mathbf{c}(t) dt, \quad (10)$$

and the transmittance as

$$\bar{T}_i = \exp \left( - \sum_{j=1}^{i-1} \bar{\sigma}_j \delta_j \right). \quad (11)$$

After substituting the terms defined in Equations (9), (10) and (11) into Equation (8) and simplifying, we obtain the following expression for the piecewise volume rendering equation:

$$\tilde{\mathbf{C}}(\mathbf{r}) = \sum_{i=1}^N \delta_i^{-1} \int_{t_{i-1}}^{t_i} \sigma(t) dt \cdot \int_{t_{i-1}}^{t_i} \mathbf{c}(t) dt \cdot \prod_{j=1}^{i-1} \exp \left( - \int_{t_{j-1}}^{t_j} \sigma(s) ds \right). \quad (12)$$

### 2.2. Calculation via Quadrature

To obtain the quadrature rule proposed by Max [3], used in the NeRF model, we first note that in the limit of  $\bar{\sigma}_i \delta_i \rightarrow 0$  the following Taylor expansion holds

$$\exp(\bar{\sigma}_i \delta_i) \stackrel{\bar{\sigma}_i \delta_i \rightarrow 0}{\approx} 1 + \bar{\sigma}_i \delta_i + O(\bar{\sigma}_i \delta_i). \quad (13)$$

That is, using the definition of  $\bar{\sigma}_i$  from Equation (9) we have

$$1 - \exp(-\bar{\sigma}_i \delta_i) \approx \bar{\sigma}_i \delta_i = \int_{t_{i-1}}^{t_i} \sigma(t) dt, \quad (14)$$

yielding the quadrature

$$\tilde{\mathbf{C}}(\mathbf{r}) = \sum_{i=1}^N \bar{T}_i (1 - \exp(-\bar{\sigma}_i \delta_i)) \bar{\mathbf{c}}_i \quad (15)$$

## 3. AutoInt Implementation

### 3.1. Overview

In the AutoInt framework, we start by specifying the architecture of the integral network: the number of layers, features, the type of non-linearities, and the input parameterization. Our implementation of AutoInt relies on a evaluating computational graphs, where dependencies are modeled using directed acyclic graphs (DAGs). With this graph-based representation, we create an automated pipeline for instantiating grad networks from integral networks, and we develop an efficient procedure for evaluating grad networks during training.

**DAGs to represent computational graphs.** Our AutoInt implementation internally maintains the computational graph of neural networks as a Directed Acyclic Graphs (DAG). Most nodes in the graph represent computational operators and there are two kinds of leaf nodes: (1) an input node with respect to which we can take the derivative of the graph and (2) a constant input node. Directed edges represent dependencies between nodes and point towards dependencies (i.e., other nodes to be computed first). Hence, nodes of in-degree zero are final results of the computation graph.

**Building the grad network.** To instantiate a *grad network*, AutoInt performs auto differentiation on the DAG of the integral network. Each node is called in a topological order and provides its own derivative. This recursive chain of calls builds the computation graph of the grad network.

**Evaluating the grad network.** Once the grad network is built it can be evaluated using a reverse topological ordering of its nodes: starting from the leaves and tracing computation back to the root(s). Note that this procedure is different than backpropagation, where intermediate results from the forward pass are stored in order to evaluate the graph associated with the backward pass. In AutoInt, given the grad network is a separate entity from the integral network, the intermediate results from the forward pass are unavailable. However, the grad network can still be computed efficiently by reusing computations from the “legs” of the network, since these nodes share weights and perform the same computations (see Figure 1). This is done by maintaining a lexicographic ordering between nodes of same in-degree in the



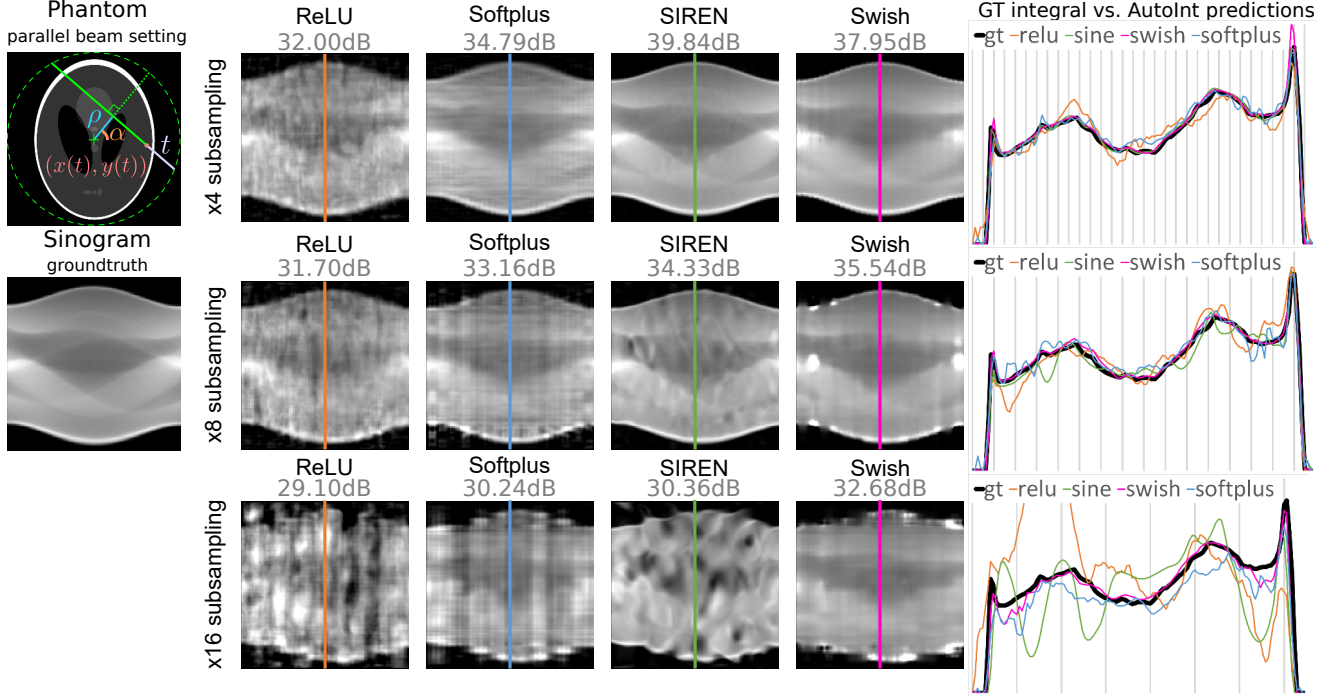

Figure 2. Supplemental results of AutoInt for computed tomography. Left: illustration of the parameterization. Center: sinograms computed with the integral networks using different nonlinear activation functions. The ground truth (GT) sinogram is subsampled in angle by  $4\times$  (top),  $8\times$  (middle), and  $16\times$  (bottom). The optimized networks are used to interpolate the missing measurements. Using the Swish activation performs best in these experiments. Right: 1D scanlines of the sinogram centers shows the interpolation behavior of each method for each subsampling level.

produce relatively noisy inpainted results. ReLU is particularly unsuited to learning this representation, as its derivative, which appears in the grad network, has a zero-valued derivative almost everywhere.

## 4.2. Supervising the Integral Network

In the main paper, we use AutoInt to supervise the grad network and then reconstruct the integral network. It is also possible to directly supervise the integral network,  $\Phi_\theta$ , to learn an antiderivative. One way to do this is with a provided dataset of definite integrals. For example, consider we wish to learn an antiderivative  $F(x)$  over an interval  $[a, b]$ . In this case, we can supervise the integral network directly over definite integrals  $F(x_2) - F(x_1) = \int_{x_1}^{x_2} f(x)dx$  for  $x_1, x_2 \in [a, b]$ . Here, the integral network is trained to minimize a loss function of the following form.

$$\arg \min_{\theta} \|\Phi_\theta(x_2) - \Phi_\theta(x_1) - [F(x_2) - F(x_1)]\|_2^2. \quad (16)$$

We demonstrate training a neural network with Swish nonlinearities to learn a sigmoid function  $F(x) = 1/(1 + e^{-x})$  from a dataset of randomly sampled definite integrals as described by Equation 16. The resulting fit is shown in Figure 3. The network accurately fits the sigmoid function up

to a scalar constant (which we remove in the visualization of Figure 3).

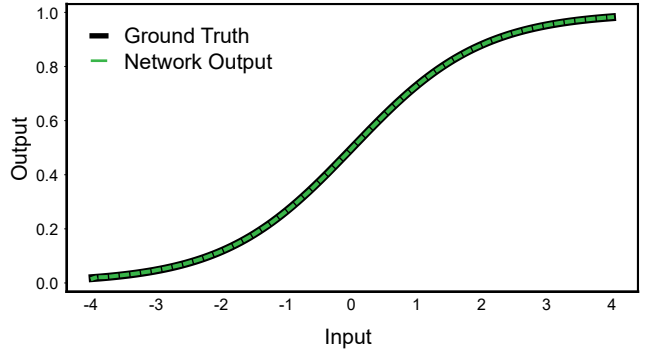

Figure 3. Supervising the integral network with definite integrals. We set an antiderivative  $F$  to be equal to a sigmoid function and supervise an integral network with values of definite integrals as described by Equation 16. The network recovers the antiderivative  $F$  up to a scalar constant and is compared to ground truth (we remove the offset for visualization).

## 4.3. Results on Captured Data

In Figure 4, we include supplemental results using real captured data from DeepVoxels [9]. The scenes were trained on half of the randomly sampled images of the pro-

vided RGB data and are shown here for a held out test set. Both AutoInt results using 8 and 32 sections achieve similarly high image quality on these captured scenes.

We also show results from the Local Light Field Fusion (LLFF) datasets [4] and qualitative comparisons between NeRF [5] and AutoInt in Figure 5. The LLFF datasets consist of captured, forward-facing image data, and we train and evaluate all images at a resolution of 378 by 504 pixels. We train with a batch size of one and otherwise use the same training parameters as the Blender datasets as described in the main text. Following the LLFF authors, we partition the captured images so that 1/8 of the images are used for the test set. In Table 1, we show quantitative comparisons between AutoInt and NeRF for the LLFF datasets.

#### 4.4. Synthetic Blender Dataset Scenes

We show extended results that evaluate the effect of the sampling network for a range of piecewise sections in the approximate VRE in Figure 6. Additional qualitative comparisons on the synthetic Blender datasets are provided in Figure 7, where we compare our method to Neural Volumes [2] and NeRF [5]. Finally, in Table 2 we provide additional quantitative evaluations using peak signal-to-noise ratio (PSNR), the structural similarity index measure (SSIM) [10], and the learned perceptual image patch similarity (LPIPS) metric [11].

## References

- [1] Diederik P. Kingma and Jimmy Ba. Adam: A method for stochastic optimization. *Proc. ICLR*, 2014. 3
- [2] Stephen Lombardi, Tomas Simon, Jason Saragih, Gabriel Schwartz, Andreas Lehrmann, and Yaser Sheikh. Neural volumes: Learning dynamic renderable volumes from images. *ACM Trans. Graph. (SIGGRAPH)*, 38(4), 2019. 5, 8, 9
- [3] Nelson Max. Optical models for direct volume rendering. *IEEE Trans. Vis. Comput. Graph.*, 1(2):99–108, 1995. 2
- [4] Ben Mildenhall, Pratul P. Srinivasan, Rodrigo Ortiz-Cayon, Nima Khademi Kalantari, Ravi Ramamoorthi, Ren Ng, and Abhishek Kar. Local light field fusion: Practical view synthesis with prescriptive sampling guidelines. *ACM Trans. Graph. (SIGGRAPH)*, 38(4), 2019. 5, 6, 7
- [5] Ben Mildenhall, Pratul P. Srinivasan, Matthew Tancik, Jonathan T. Barron, Ravi Ramamoorthi, and Ren Ng. NeRF: Representing scenes as neural radiance fields for view synthesis. In *Proc. ECCV*, 2020. 5, 7, 8, 9
- [6] Ulrich Mutze. The fundamental theorem of calculus in  $\mathbb{R}^n$ . Technical report, 2010. [https://web.ma.utexas.edu/mp\\_arc/c/04/04-165.pdf](https://web.ma.utexas.edu/mp_arc/c/04/04-165.pdf). 1
- [7] Adam Paszke, Sam Gross, Francisco Massa, Adam Lerer, James Bradbury, et al. Pytorch: An imperative style, high-performance deep learning library. In *Proc. NeurIPS*, 2019. 3
- [8] Vincent Sitzmann, Julien N. P. Martel, Alexander W. Bergman, David B. Lindell, and Gordon Wetzstein. Implicit neural representations with periodic activation functions. In *Proc. NeurIPS*, 2020. 3
- [9] Vincent Sitzmann, Justus Thies, Felix Heide, Matthias Nießner, Gordon Wetzstein, and Michael Zollhöfer. DeepVoxels: Learning persistent 3D feature embeddings. In *Proc. CVPR*, 2019. 4, 6
- [10] Zhou Wang, Alan C. Bovik, Hamid R. Sheikh, and Eero P. Simoncelli. Image quality assessment: From error visibility to structural similarity. *IEEE Trans. Image Process.*, 13(4):600–612, 2004. 5
- [11] Richard Zhang, Phillip Isola, Alexei A. Efros, Eli Shechtman, and Oliver Wang. The unreasonable effectiveness of deep features as a perceptual metric. In *Proc. CVPR*, 2018. 5



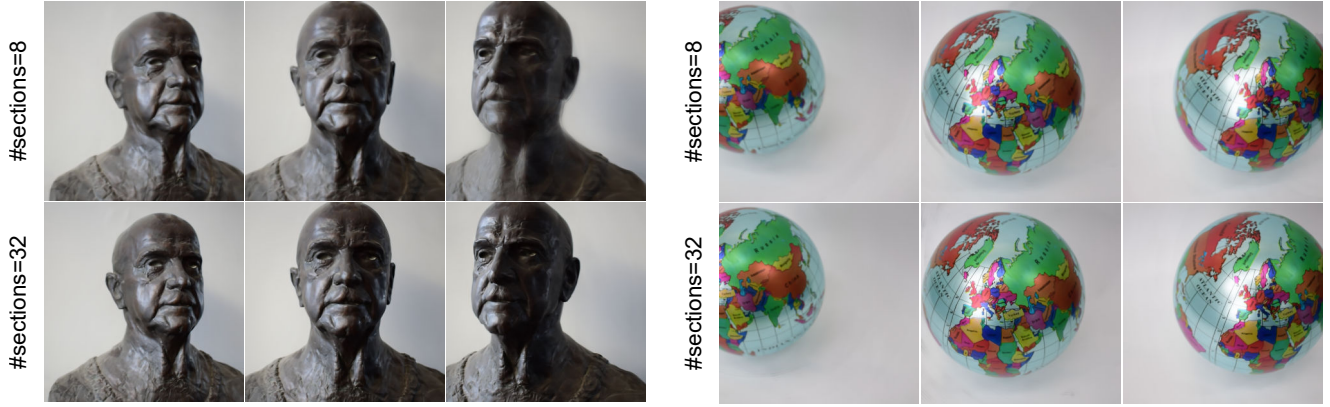

Figure 4. Supplemental results of AutoInt for real captures. We show qualitative results of AutoInt with 8 and 32 sections on the *Statue* and the *Globe* scenes used in DeepVoxels [9].

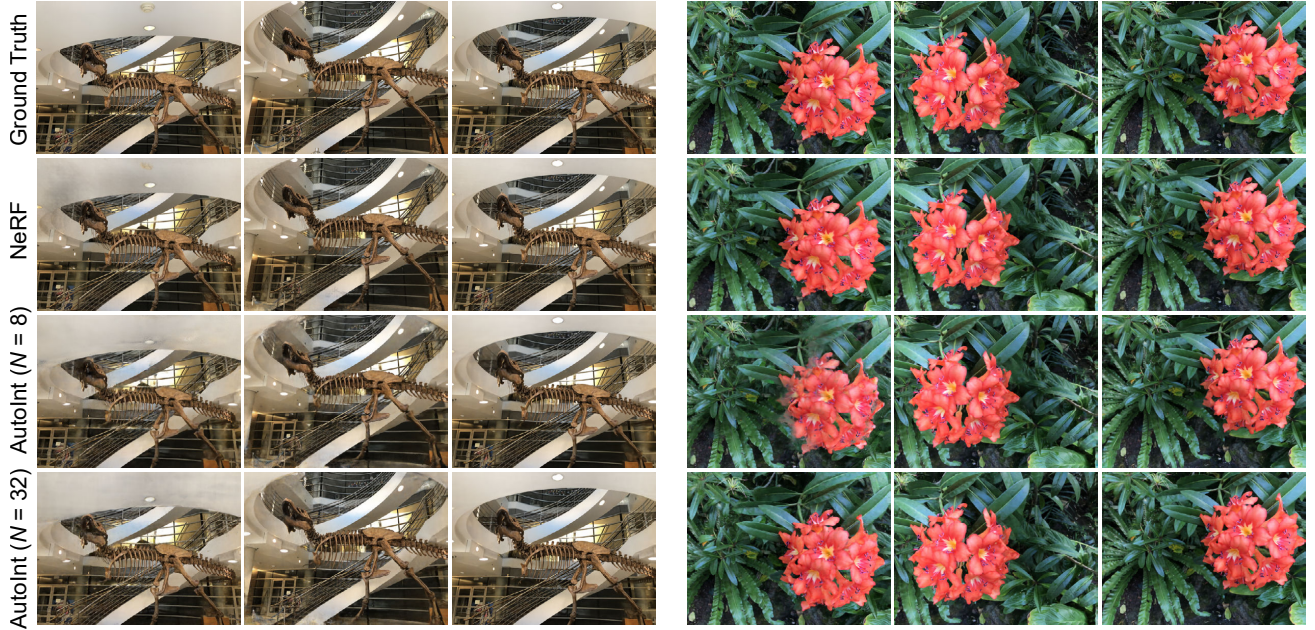

Figure 5. Supplemental results of AutoInt for real captures from the Local Light Field Fusion datasets [4]. We show qualitative results of AutoInt with 8 and 32 sections on the *T-Rex* and *Flower* scenes.

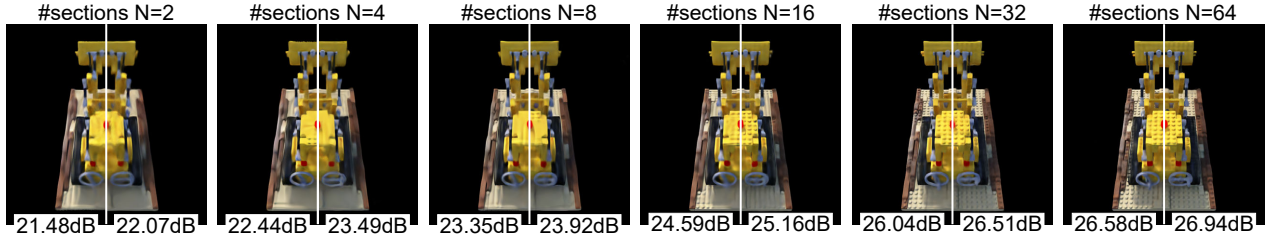

Figure 6. Ablation studies. A view of the *Lego* scene is shown with a varying number of intervals ( $N = \{2, 4, 8, 16, 32, 64\}$ ) without (left half of the images) and with (right half) the sampling network. PSNR is computed on the 200 test set views.

| PSNR $\uparrow$    |              |              |              |              |              |              |              |              |
|--------------------|--------------|--------------|--------------|--------------|--------------|--------------|--------------|--------------|
|                    | Room         | Fern         | Leaves       | Fortress     | Orchids      | Flower       | T-Rex        | Horns        |
| NeRF [5]           | <b>33.60</b> | <b>26.92</b> | <b>22.50</b> | <b>32.94</b> | <b>21.37</b> | <b>28.57</b> | <b>28.26</b> | <b>29.26</b> |
| AutoInt ( $N=8$ )  | 28.33        | 22.11        | 19.61        | 28.63        | 16.85        | 26.65        | 24.90        | 26.01        |
| AutoInt ( $N=16$ ) | 29.97        | 23.29        | 18.78        | <u>29.53</u> | <u>17.71</u> | 27.60        | 25.58        | 26.72        |
| AutoInt ( $N=32$ ) | <u>30.72</u> | <u>23.51</u> | <u>20.84</u> | 28.95        | 17.30        | <u>28.11</u> | <u>27.18</u> | <u>27.64</u> |

  

| SSIM $\uparrow$    |              |              |              |              |              |              |              |              |
|--------------------|--------------|--------------|--------------|--------------|--------------|--------------|--------------|--------------|
|                    | Room         | Fern         | Leaves       | Fortress     | Orchids      | Flower       | T-Rex        | Horns        |
| NeRF [5]           | <b>0.980</b> | <b>0.903</b> | <b>0.851</b> | <b>0.962</b> | <b>0.800</b> | <b>0.931</b> | <b>0.953</b> | <b>0.947</b> |
| AutoInt ( $N=8$ )  | 0.941        | 0.771        | 0.745        | 0.896        | 0.560        | 0.882        | 0.888        | 0.880        |
| AutoInt ( $N=16$ ) | 0.954        | 0.802        | 0.712        | <u>0.914</u> | <u>0.607</u> | 0.903        | 0.904        | 0.894        |
| AutoInt ( $N=32$ ) | <u>0.966</u> | <u>0.810</u> | <u>0.795</u> | 0.910        | 0.583        | <u>0.917</u> | <u>0.931</u> | <u>0.908</u> |

  

| LPIPS $\downarrow$ |              |              |              |              |              |              |              |              |
|--------------------|--------------|--------------|--------------|--------------|--------------|--------------|--------------|--------------|
|                    | Room         | Fern         | Leaves       | Fortress     | Orchids      | Flower       | T-Rex        | Horns        |
| NeRF [5]           | <b>0.038</b> | <b>0.085</b> | <b>0.103</b> | <b>0.024</b> | <b>0.108</b> | <b>0.057</b> | <b>0.049</b> | <b>0.058</b> |
| AutoInt ( $N=8$ )  | 0.110        | <u>0.276</u> | 0.171        | 0.092        | 0.313        | 0.113        | 0.123        | 0.213        |
| AutoInt ( $N=16$ ) | 0.102        | 0.283        | 0.218        | <u>0.086</u> | <u>0.268</u> | 0.090        | 0.107        | 0.202        |
| AutoInt ( $N=32$ ) | <u>0.075</u> | 0.277        | <u>0.156</u> | 0.107        | 0.302        | <u>0.075</u> | <u>0.080</u> | <u>0.177</u> |

Table 1. Per-scene quantitative results calculated across the test sets of the Local Light Field Fusion datasets [4].

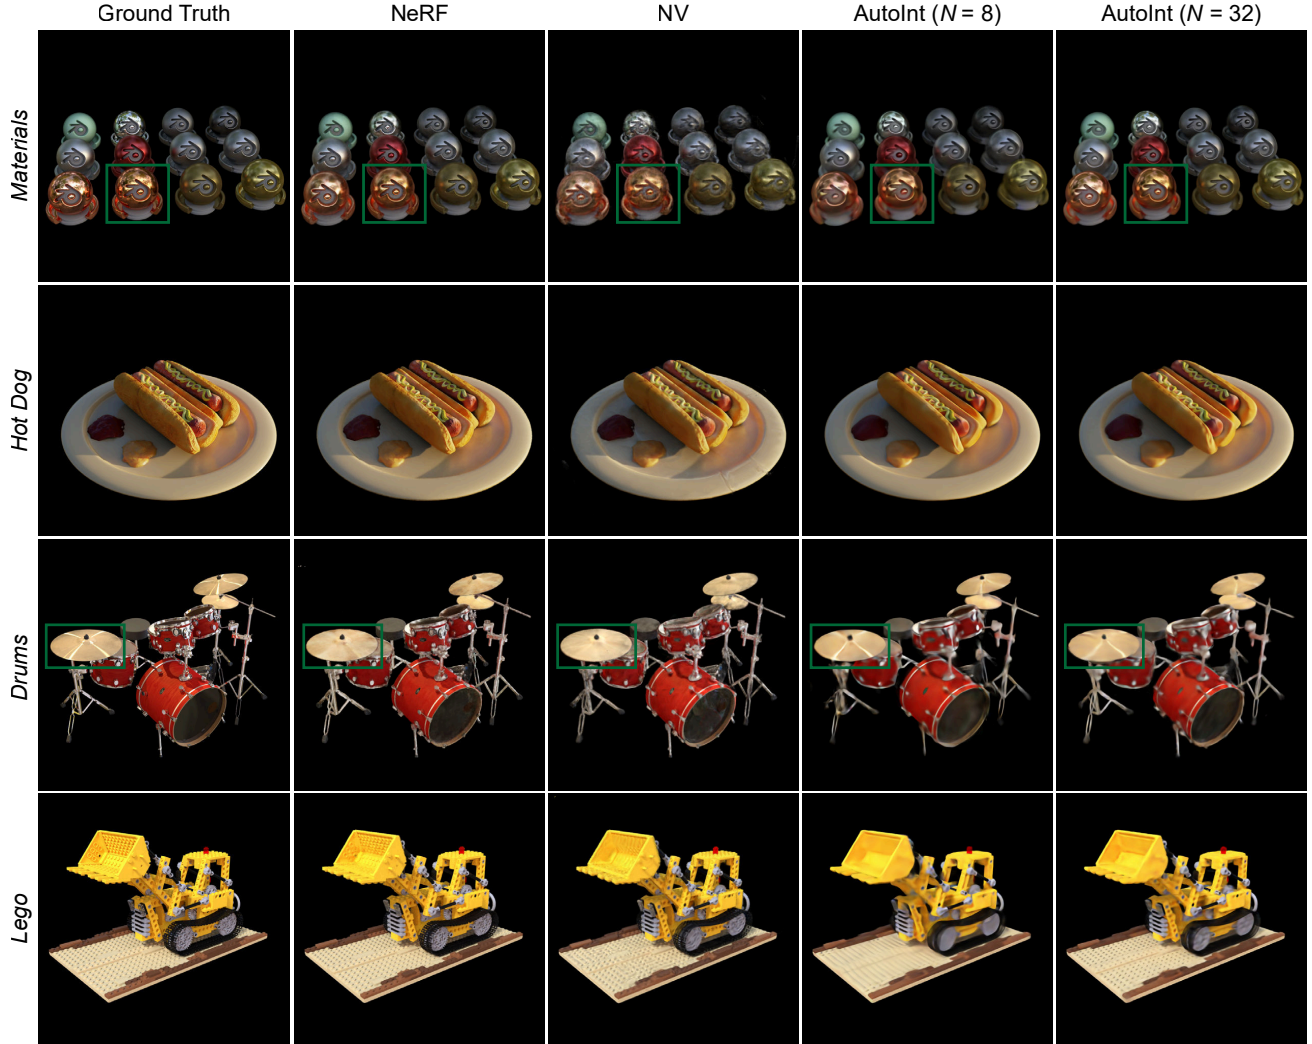

Figure 7. Qualitative results. We compare the performance of Neural Volumes [2] and NeRF [5] to AutoInt using  $N = 8$  and  $N = 32$  in our approximate volume rendering equation. AutoInt accurately captures view-dependent effects like specular reflections (green boxes) and reduces render times by greater than  $10\times$  relative to NeRF, though with some reduction in overall image quality.



|                    | PSNR $\uparrow$ |              |              |              |              |              |              |              |
|--------------------|-----------------|--------------|--------------|--------------|--------------|--------------|--------------|--------------|
|                    | Chair           | Drums        | Ficus        | Hotdog       | Lego         | Materials    | Mic          | Ship         |
| NeRF [5]           | <b>33.00</b>    | <b>25.01</b> | <b>30.13</b> | <b>36.18</b> | <b>32.54</b> | <b>29.62</b> | <b>32.91</b> | <b>28.65</b> |
| NV [2]             | <u>28.33</u>    | <u>22.58</u> | 24.79        | 30.71        | 26.08        | 24.22        | 27.78        | 23.93        |
| AutoInt ( $N=8$ )  | 25.60           | 20.78        | 22.47        | 32.33        | 25.09        | 25.90        | 28.10        | 24.15        |
| AutoInt ( $N=16$ ) | 25.65           | 21.30        | 23.95        | 31.28        | 25.48        | 28.05        | 28.36        | 24.26        |
| AutoInt ( $N=32$ ) | 25.82           | 22.02        | <u>25.51</u> | <u>31.84</u> | <u>27.26</u> | <u>28.58</u> | <u>28.42</u> | <u>25.18</u> |

  

|                    | SSIM $\uparrow$ |              |              |              |              |              |              |              |
|--------------------|-----------------|--------------|--------------|--------------|--------------|--------------|--------------|--------------|
|                    | Chair           | Drums        | Ficus        | Hotdog       | Lego         | Materials    | Mic          | Ship         |
| NeRF [5]           | <b>0.967</b>    | <b>0.925</b> | <b>0.964</b> | <b>0.974</b> | <b>0.961</b> | <b>0.949</b> | <b>0.980</b> | <u>0.856</u> |
| NV [2]             | 0.916           | 0.879        | 0.910        | 0.944        | 0.880        | 0.888        | 0.946        | 0.784        |
| AutoInt ( $N=8$ )  | <u>0.928</u>    | 0.861        | 0.898        | <b>0.974</b> | 0.900        | 0.930        | 0.948        | 0.852        |
| AutoInt ( $N=16$ ) | 0.925           | 0.869        | 0.909        | 0.971        | 0.905        | 0.947        | <u>0.951</u> | 0.853        |
| AutoInt ( $N=32$ ) | 0.926           | <u>0.885</u> | <u>0.926</u> | <u>0.973</u> | <u>0.929</u> | <u>0.953</u> | <u>0.951</u> | <b>0.869</b> |

  

|                    | LPIPS $\downarrow$ |              |              |              |              |              |              |              |
|--------------------|--------------------|--------------|--------------|--------------|--------------|--------------|--------------|--------------|
|                    | Chair              | Drums        | Ficus        | Hotdog       | Lego         | Materials    | Mic          | Ship         |
| NeRF [5]           | <b>0.046</b>       | <b>0.091</b> | <b>0.044</b> | 0.121        | <b>0.050</b> | <b>0.063</b> | <b>0.028</b> | <b>0.206</b> |
| NV [2]             | <u>0.109</u>       | 0.214        | 0.162        | 0.109        | 0.175        | 0.130        | <u>0.107</u> | <u>0.276</u> |
| AutoInt ( $N=8$ )  | 0.141              | 0.224        | 0.148        | <b>0.080</b> | 0.175        | 0.136        | 0.131        | 0.323        |
| AutoInt ( $N=16$ ) | 0.149              | 0.221        | 0.139        | 0.095        | 0.171        | 0.110        | 0.130        | 0.320        |
| AutoInt ( $N=32$ ) | 0.149              | <u>0.209</u> | <u>0.109</u> | <u>0.088</u> | <u>0.135</u> | <u>0.100</u> | 0.127        | 0.295        |

Table 2. Per-scene quantitative results calculated across the test sets of the synthetic Blender datasets. These simulated scenes contain challenging geometries and reflectance properties.
